# Supplementary material for: Overcoming barriers to reproducibility in geoscientific data analysis: Challenges and practical implementation strategies
Source: Copernicus journal article supplement (doi:10.5194/egusphere-2025-5210), 2025-10-27

# Exploratory analysis of data and code availability statements in Copernicus journals

Code <sup>1</sup>

AUTHOR

Matthias Schlögl  

AFFILIATIONS

[BOKU University](#)

[GeoSphere Austria](#)

## Introduction

---

Reproducibility is a cornerstone of scientific research, yet its implementation across disciplines remains inconsistent. To gain a preliminary understanding of reproducibility practices within the geosciences community, we reached out to two major publishers: the American Geophysical Union (AGU) and the European Geosciences Union (EGU, through Copernicus Publications). Specifically, we sought information on their policies and practices regarding data and code availability.

## AGU

---

The AGU directed attention to their data policy guidelines as part of their publication requirements, referencing the information that is publicly accessible on their website.<sup>1</sup>:

*AGU **requires** that the underlying data and/or software or code needed to understand, evaluate, and build upon the reported research be available at the time of peer review and publication.*

## EGU

---

The EGU, through Copernicus Publications, publishes a wide range of peer-reviewed open-access journals that cover diverse topics in Earth, planetary, and space sciences<sup>2</sup>.

Copernicus Publications offers metadata and full-text XML files for all published articles<sup>3</sup>. These files are formatted using the NLM (PMC) standard<sup>4</sup> and are accessible via the Open Archives Initiative Protocol for Metadata Harvesting (OAI-PMH)<sup>5</sup>. This approach ensures that research outputs are easily discoverable and reusable by the scientific community.

# Setup

## R packages required for the analysis

- [tidyverse](#)
- [ggrepel](#)
- [here](#)
- [english](#)

► Code

## Custom functions

► Code

## Data

► Code

## Overview of publications

We scraped and analyzed the full-text XML-files for 25 Copernicus journals in the field of geosciences for the period 2016-01-01–2024-12-31, resulting in a total number of 32129 articles ([Figure 1](#)). However, due to inconsistencies in the results for 2016, which were likely caused by changes in the XML structure, data from that year were excluded from the analysis of statements.

► Code

| doi                                    | journal | volume   | pages | year              |                                               |
|----------------------------------------|---------|----------|-------|-------------------|-----------------------------------------------|
| <chr>                                  | <fct>   | <int>    | <int> | <int>             | ►                                             |
| 10.5194/acp-16-1-2016                  | acp     | 16       | 1     | 2016              |                                               |
| 10.5194/acp-16-21-2016                 | acp     | 16       | 21    | 2016              |                                               |
| 10.5194/acp-16-35-2016                 | acp     | 16       | 35    | 2016              |                                               |
| 10.5194/acp-16-47-2016                 | acp     | 16       | 47    | 2016              |                                               |
| 10.5194/acp-16-71-2016                 | acp     | 16       | 71    | 2016              |                                               |
| 10.5194/acp-16-85-2016                 | acp     | 16       | 85    | 2016              |                                               |
| 10.5194/acp-16-101-2016                | acp     | 16       | 101   | 2016              |                                               |
| 10.5194/acp-16-123-2016                | acp     | 16       | 123   | 2016              |                                               |
| 10.5194/acp-16-135-2016                | acp     | 16       | 135   | 2016              |                                               |
| 10.5194/acp-16-145-2016                | acp     | 16       | 145   | 2016              |                                               |
| 1-10 of 10,000 rows   1-5 of 6 columns |         | Previous | 1     | <a href="#">2</a> | <a href="#">3</a>                             |
|                                        |         |          |       | <a href="#">4</a> | <a href="#">5</a>                             |
|                                        |         |          |       | <a href="#">6</a> | ... <a href="#">1000</a> <a href="#">Next</a> |

► Code

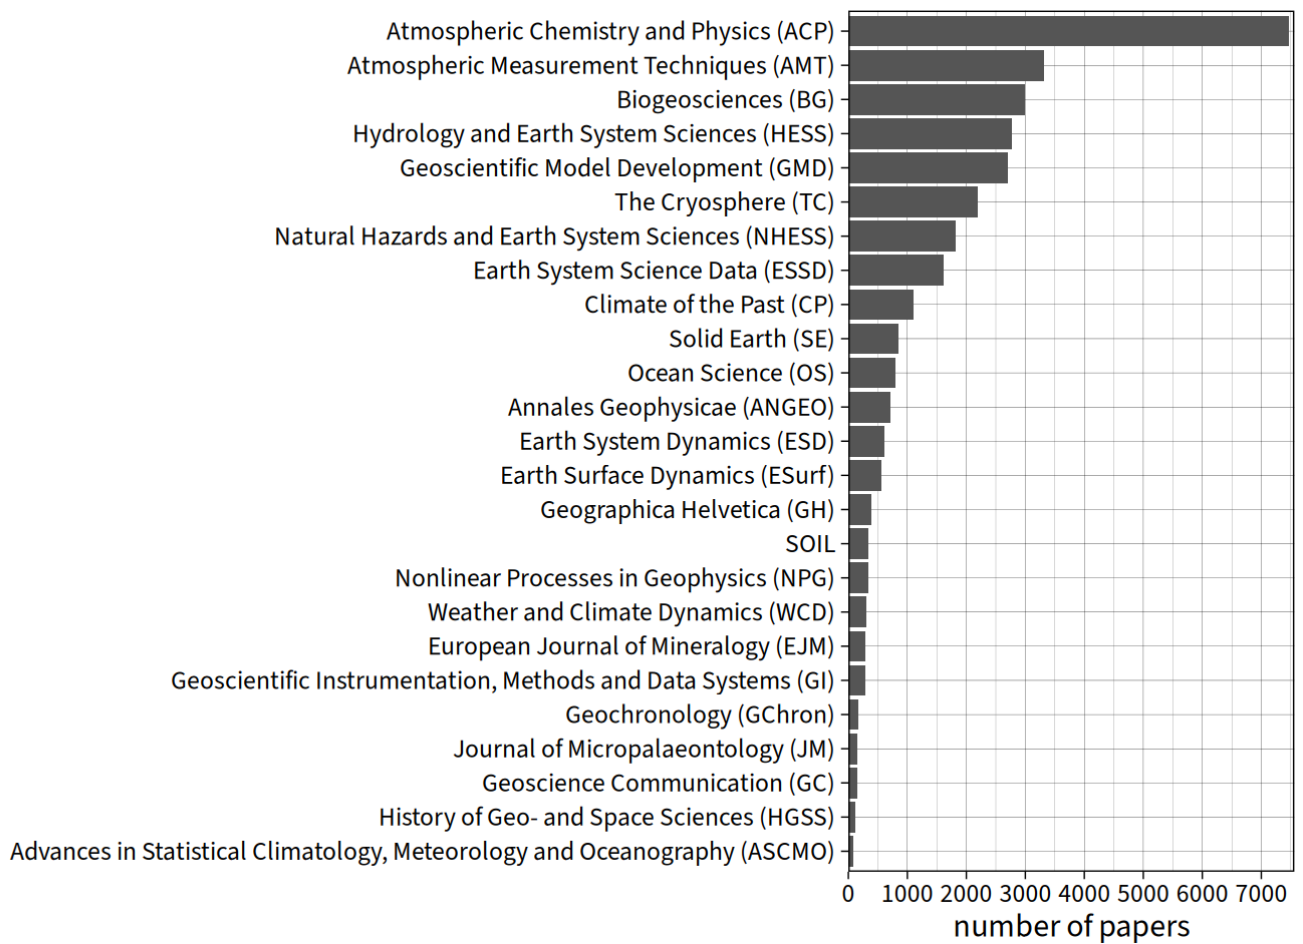

Figure 1: Overview of geoscience journals (published by Copernicus Publishing) and the corresponding number of articles published during the time period between 2016-01-01 and 2024-12-31.

# Overview of statements

The section names of paragraphs addressing code and data availability are generally consistent across articles, though a few exceptions with varying section titles were observed. Below is a list of all simplified section name variations that appeared more than once:

► Code

| title                             | n     |
|-----------------------------------|-------|
| <chr>                             | <int> |
| dataavailability                  | 20971 |
| codedataavailability              | 5893  |
| codeanddataavailability           | 181   |
| dataavailabilityanduserguidelines | 3     |
| dataformatsandavailability        | 3     |
| dataandcodeavailability           | 2     |
| dataavailabilityandfilestructure  | 2     |
| dataavailabilityandstructure      | 2     |
| dataavailabilityanduse            | 2     |
| datausageandavailability          | 2     |
| 1-10 of 10 rows                   |       |

► Code

| title                   | n     |
|-------------------------|-------|
| <chr>                   | <int> |
| codedataavailability    | 5893  |
| codeavailability        | 4059  |
| codeanddataavailability | 181   |
| dataandcodeavailability | 2     |
| 4 rows                  |       |

► Code

The inclusion of data availability statements remains consistently high, with a median of 97% of all papers across journals and years containing such statements. Notably, only 3 journals reported a share below 75% in more than one year ([Figure 2](#)).

► Code

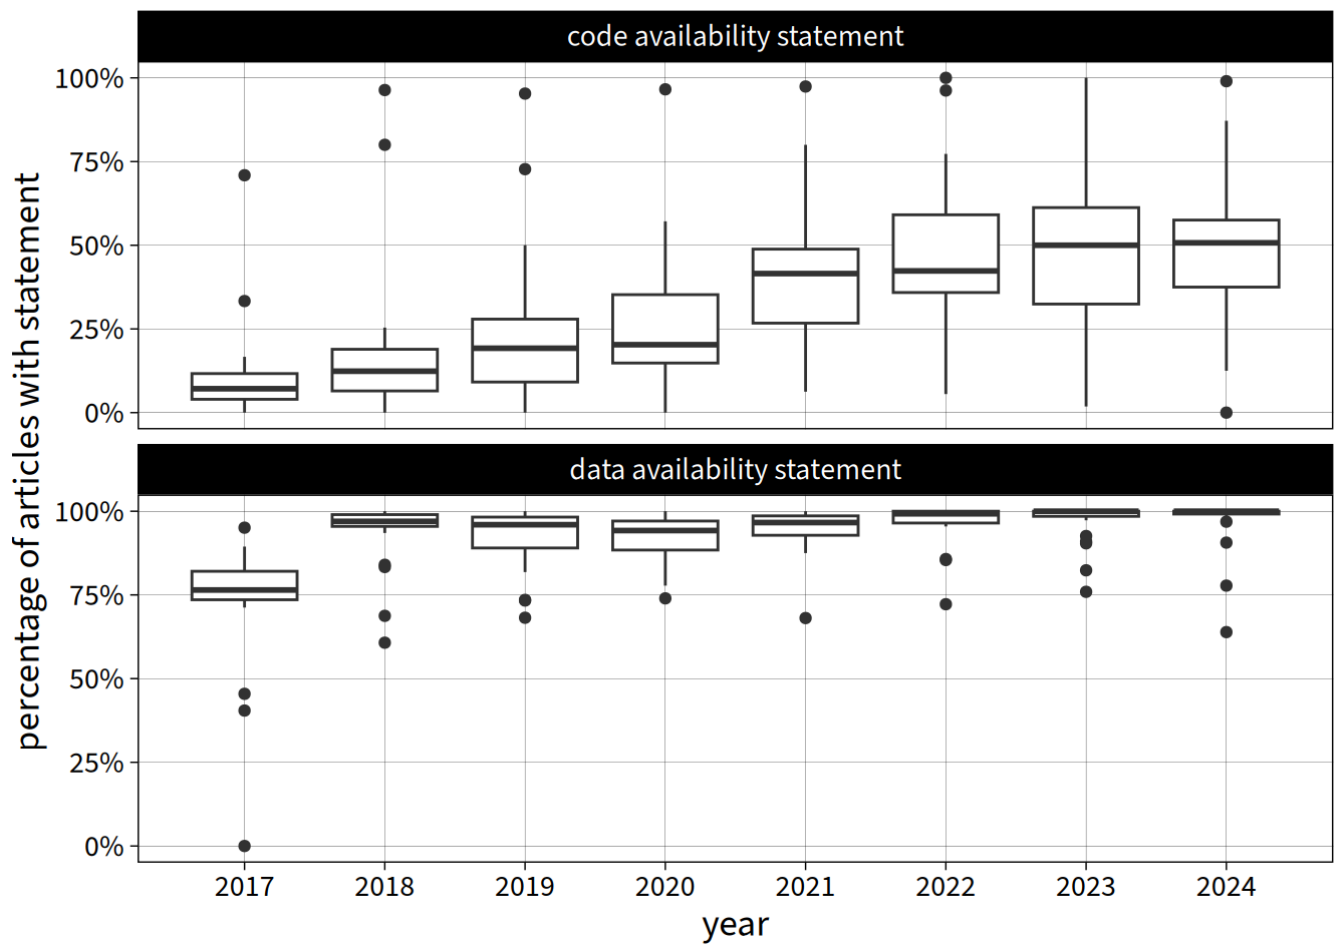

Figure 2: Share of articles published in 25 geoscience journals between 2017-01-01 and 2024-12-31.

The proportion of articles including a code availability statement is substantially lower. Notably, only *Geoscientific Model Development*, being a dedicated outlet for the publication and discussion of numerical models and geoscientific software, consistently includes such statements in nearly all published articles.

## Content of statements

While the presence of data and code availability statements is a positive indicator, it does not necessarily reflect practical reproducibility. To gain deeper insights into the actual content of these statements, we conducted a targeted search for specific keywords and phrases within them.

### ► Code

It is important to note that this exploratory analysis likely includes double-counts, as approximately 6080 statements combine both data and code availability information.

## Data availability

### ► Code

Data is most commonly shared through the generalist repository [zenodo](#), followed by [PANGAEA](#), a specialized repository for Earth and environmental sciences ([Figure 3](#)). Approximately 48% of all statements include a URL<sup>6</sup>, about 18% reference a citation likely found in the reference list<sup>7</sup>, and about 10% contain the string `doi` (case insensitive). Approximately 4 percent include the literal string `from the author`, suggesting that some data may only be available upon request from the authors.

### ► Code

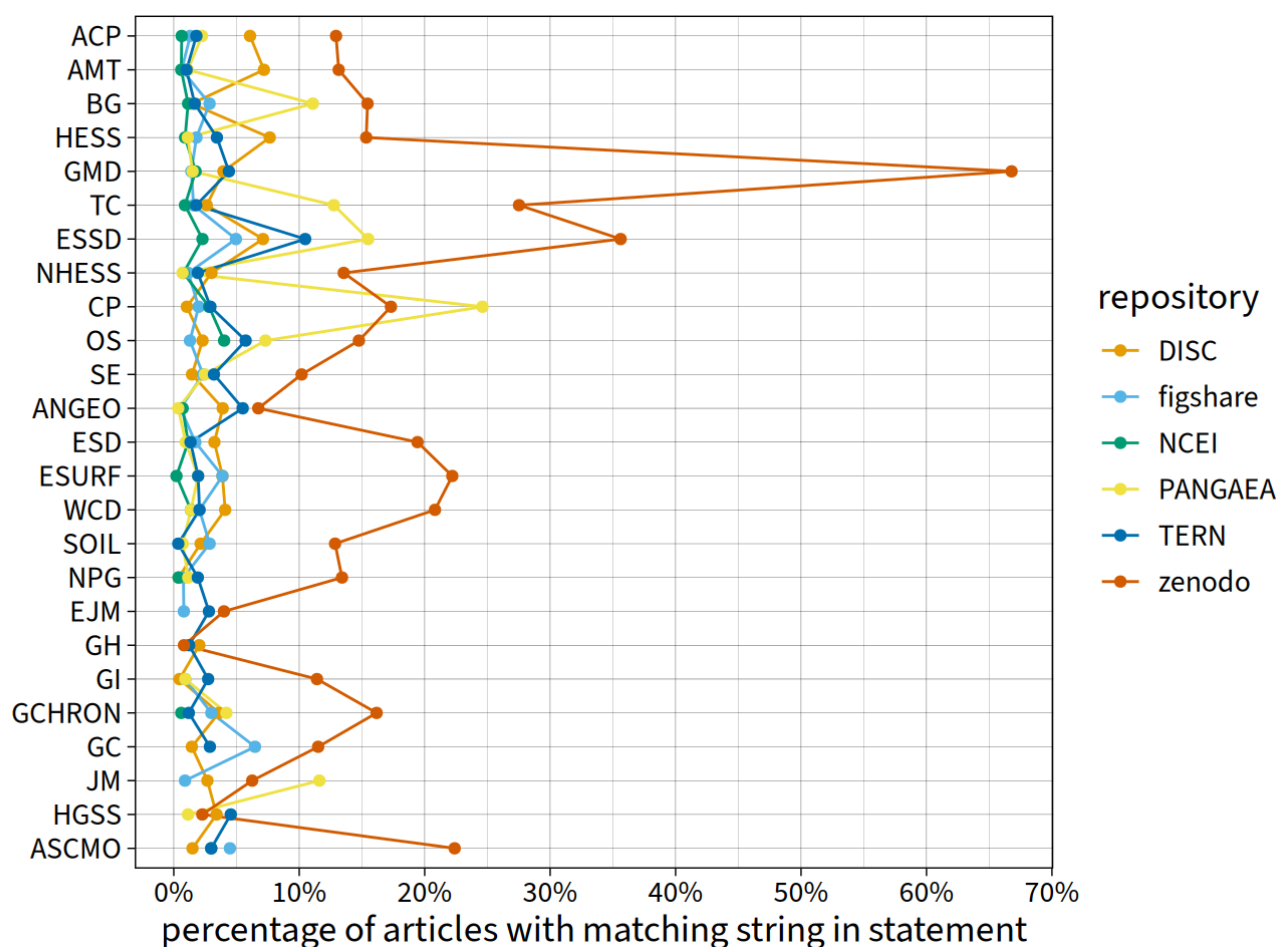

Figure 3: Occurrence of selected strings in data availability statements. Journals are ordered according to the absolute number in descending order.

## Code availability

Code is primarily shared via [zenodo](#) and [GitHub](#) (Figure 4). However, due to the relatively lower number of code availability statements, the potential impact of double-counting zenodo entries may be more pronounced in this context.

### ► Code

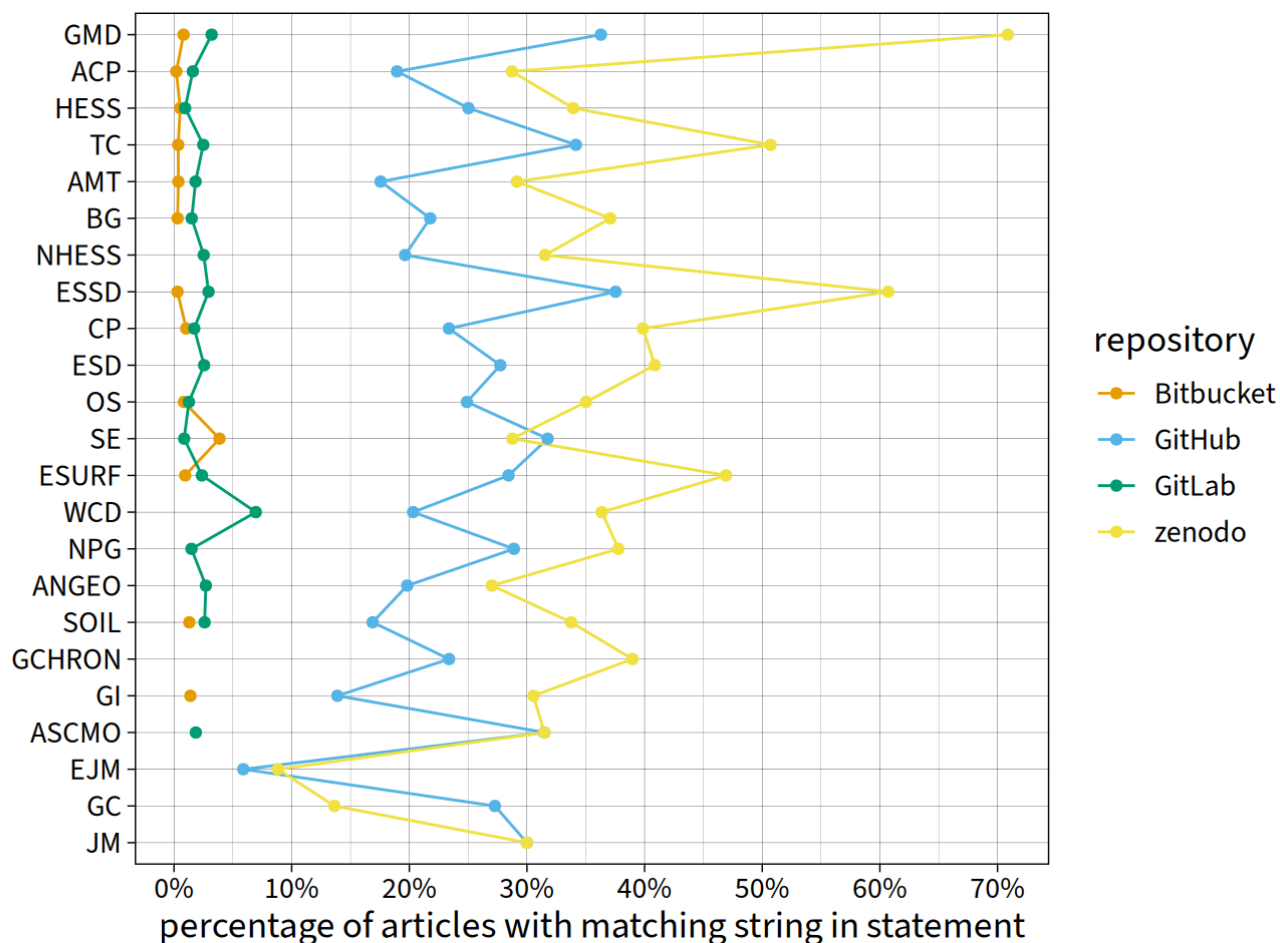

Figure 4: Occurrence of selected strings in code availability statements. Journals are ordered according to the absolute number in descending order.

A joint visualization of the share of data availability statements against the share of code availability statements for the selected journals provides a visual representation of how these two aspects correlate across journals ([Figure 5](#)).

► Code

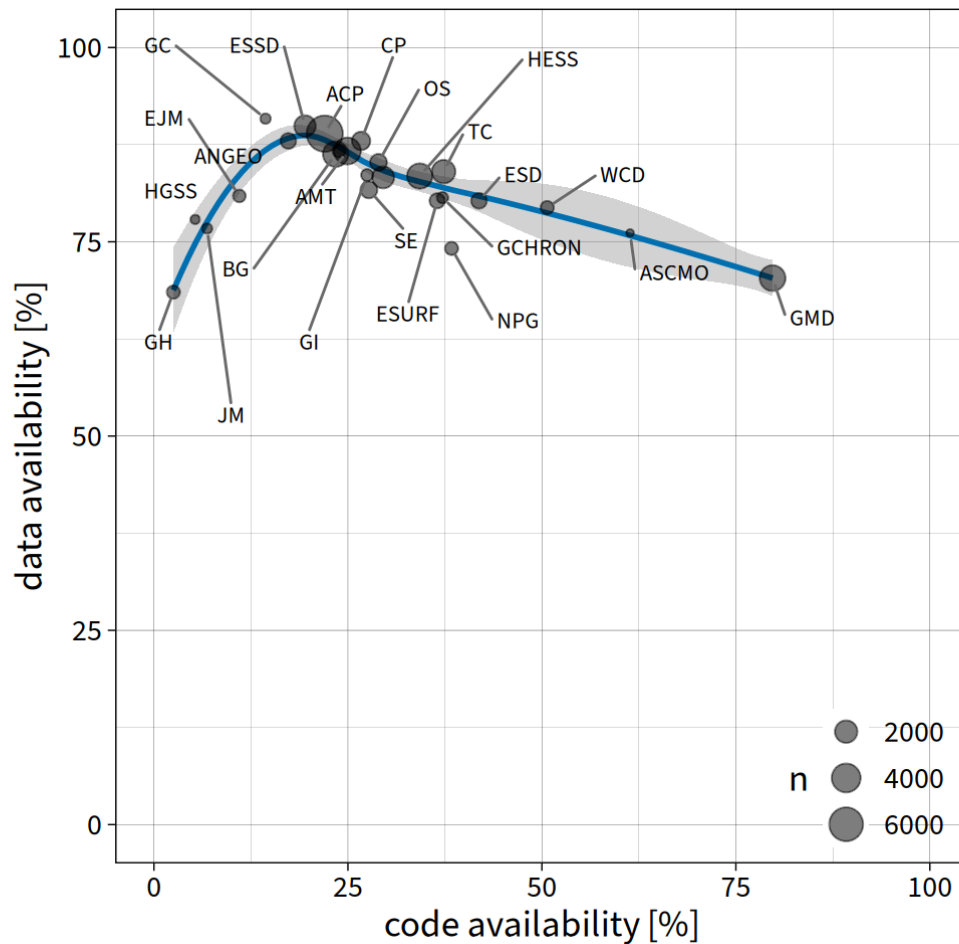

Figure 5: Share of data and code availability statements across journals. The point size represents the total number of articles published per journal. The smoothed line is a LOESS curve weighted by the number of observations for each journal.

## Acknowledgements

Thanks to Dr. Johannes Wagner from Copernicus Publications for his valuable assistance in accessing the code and data availability statements of Copernicus journals.



# R session info

---

## ► Code

### – Session info

---

| setting  | value                             |
|----------|-----------------------------------|
| version  | R version 4.5.1 (2025-06-13)      |
| os       | Ubuntu 24.04.3 LTS                |
| system   | x86_64, linux-gnu                 |
| ui       | X11                               |
| language | (EN)                              |
| collate  | en_US.UTF-8                       |
| ctype    | en_US.UTF-8                       |
| tz       | Etc/UTC                           |
| date     | 2025-10-27                        |
| pandoc   | 3.8.1 @ /usr/bin/ (via rmarkdown) |
| quarto   | 1.7.32 @ /usr/local/bin/quarto    |

### – Packages

---

| ! package   | * | version | date (UTC) | lib | source         |
|-------------|---|---------|------------|-----|----------------|
| P bit       |   | 4.6.0   | 2025-03-06 | [?] | RSPM (R 4.5.0) |
| P bit64     |   | 4.6.0-1 | 2025-01-16 | [?] | RSPM (R 4.5.0) |
| P cli       |   | 3.6.5   | 2025-04-23 | [?] | RSPM (R 4.5.0) |
| P crayon    |   | 1.5.3   | 2024-06-20 | [?] | RSPM (R 4.5.0) |
| P digest    |   | 0.6.37  | 2024-08-19 | [?] | RSPM (R 4.5.0) |
| P dplyr     | * | 1.1.4   | 2023-11-17 | [?] | RSPM (R 4.5.0) |
| P english   | * | 1.2-6   | 2021-08-21 | [?] | RSPM (R 4.5.0) |
| P evaluate  |   | 1.0.4   | 2025-06-18 | [?] | RSPM (R 4.5.0) |
| P farver    |   | 2.1.2   | 2024-05-13 | [?] | RSPM (R 4.5.0) |
| P fastmap   |   | 1.2.0   | 2024-05-15 | [?] | RSPM (R 4.5.0) |
| P forcats   | * | 1.0.0   | 2023-01-29 | [?] | RSPM (R 4.5.0) |
| P generics  |   | 0.1.4   | 2025-05-09 | [?] | RSPM (R 4.5.0) |
| P ggkabeito |   | 0.1.0   | 2021-10-18 | [?] | RSPM (R 4.5.0) |
| P ggplot2   | * | 3.5.2   | 2025-04-09 | [?] | RSPM (R 4.5.0) |
| P ggrepel   | * | 0.9.6   | 2024-09-07 | [?] | RSPM (R 4.5.0) |
| P glue      |   | 1.8.0   | 2024-09-30 | [?] | RSPM (R 4.5.0) |
| P gtable    |   | 0.3.6   | 2024-10-25 | [?] | RSPM (R 4.5.0) |
| P here      | * | 1.0.1   | 2020-12-13 | [?] | RSPM (R 4.5.0) |
| P hms       |   | 1.1.3   | 2023-03-21 | [?] | RSPM (R 4.5.0) |
| P htmltools |   | 0.5.8.1 | 2024-04-04 | [?] | RSPM (R 4.5.0) |
| P jsonlite  |   | 2.0.0   | 2025-03-27 | [?] | RSPM (R 4.5.0) |
| P knitr     |   | 1.50    | 2025-03-16 | [?] | RSPM (R 4.5.0) |
| P labeling  |   | 0.4.3   | 2023-08-29 | [?] | RSPM (R 4.5.0) |
| P lattice   |   | 0.22-7  | 2025-04-02 | [?] | CRAN (R 4.5.1) |
| P lifecycle |   | 1.0.4   | 2023-11-07 | [?] | RSPM (R 4.5.0) |
| P lubridate | * | 1.9.4   | 2024-12-08 | [?] | RSPM (R 4.5.0) |
| P magrittr  |   | 2.0.3   | 2022-03-30 | [?] | RSPM (R 4.5.0) |
| P Matrix    |   | 1.7-3   | 2025-03-11 | [?] | CRAN (R 4.5.1) |
| P mgcv      |   | 1.9-3   | 2025-04-04 | [?] | CRAN (R 4.5.1) |
| P nlme      |   | 3.1-168 | 2025-03-31 | [?] | CRAN (R 4.5.1) |
| P pillar    |   | 1.11.0  | 2025-07-04 | [?] | RSPM (R 4.5.0) |

|                |         |            |     |                |
|----------------|---------|------------|-----|----------------|
| P pkgconfig    | 2.0.3   | 2019-09-22 | [?] | RSPM (R 4.5.0) |
| P purrr        | * 1.1.0 | 2025-07-10 | [?] | RSPM (R 4.5.0) |
| P R6           | 2.6.1   | 2025-02-15 | [?] | RSPM (R 4.5.0) |
| P RColorBrewer | 1.1-3   | 2022-04-03 | [?] | RSPM (R 4.5.0) |
| P Rcpp         | 1.1.0   | 2025-07-02 | [?] | RSPM (R 4.5.0) |
| P readr        | * 2.1.5 | 2024-01-10 | [?] | RSPM (R 4.5.0) |
| renv           | 1.1.5   | 2025-07-24 | [1] | RSPM (R 4.5.1) |
| P rlang        | 1.1.6   | 2025-04-11 | [?] | RSPM (R 4.5.0) |
| P rmarkdown    | 2.29    | 2024-11-04 | [?] | RSPM (R 4.5.0) |
| P rprojroot    | 2.1.0   | 2025-07-12 | [?] | RSPM (R 4.5.0) |
| P scales       | 1.4.0   | 2025-04-24 | [?] | RSPM (R 4.5.0) |
| P sessioninfo  | 1.2.3   | 2025-02-05 | [?] | RSPM (R 4.5.0) |
| P stringi      | 1.8.7   | 2025-03-27 | [?] | RSPM (R 4.5.0) |
| P stringr      | * 1.5.1 | 2023-11-14 | [?] | RSPM (R 4.5.0) |
| P tibble       | * 3.3.0 | 2025-06-08 | [?] | RSPM (R 4.5.0) |
| P tidyr        | * 1.3.1 | 2024-01-24 | [?] | RSPM (R 4.5.0) |
| P tidyselect   | 1.2.1   | 2024-03-11 | [?] | RSPM (R 4.5.0) |
| P tidyverse    | * 2.0.0 | 2023-02-22 | [?] | RSPM (R 4.5.0) |
| P timechange   | 0.3.0   | 2024-01-18 | [?] | RSPM (R 4.5.0) |
| P tzdb         | 0.5.0   | 2025-03-15 | [?] | RSPM (R 4.5.0) |
| P vctrs        | 0.6.5   | 2023-12-01 | [?] | RSPM (R 4.5.0) |
| P vroom        | 1.6.5   | 2023-12-05 | [?] | RSPM (R 4.5.1) |
| P withr        | 3.0.2   | 2024-10-28 | [?] | RSPM (R 4.5.0) |
| P xfun         | 0.53    | 2025-08-19 | [?] | RSPM (R 4.5.0) |
| P yaml         | 2.3.10  | 2024-07-26 | [?] | RSPM (R 4.5.0) |

[1] /builds/Rexthor/reproducibility-in-geosciences/renv/library/linux-ubuntu-noble/R-4.5/x86\_64-pc-linux-gnu

[2] /root/.cache/R/renv/sandbox/linux-ubuntu-noble/R-4.5/x86\_64-pc-linux-gnu/25ebdc09

\* — Packages attached to the search path.

P — Loaded and on-disk path mismatch.

## System info

► Code

```
root@runner--azerasqr-project-62759060-concurrent-0
OS: Ubuntu 24.04.3 LTS x86_64
Kernel: Linux 5.15.154+
Packages: 641 (dpkg)
Shell: R
CPU: AMD EPYC 7B13 (2) @ 2.45 GHz
Memory: 1.05 GiB / 7.77 GiB (14%)
Disk (/): 11.03 GiB / 25.36 GiB (44%) - overlay
Disk (/builds): 11.03 GiB / 25.36 GiB (44%) - ext4
Locale: en_US.UTF-8
```

---

## Footnotes

1. <https://www.agu.org/publish-with-agu/publish/author-resources/data-and-software-for-authors> 
2. <https://www.egu.eu/publications/> 
3. [https://publications.copernicus.org/services/xml\\_harvesting\\_and\\_oai-pmh.html](https://publications.copernicus.org/services/xml_harvesting_and_oai-pmh.html) 
4. <https://pmc.ncbi.nlm.nih.gov/pub/filespec/> 
5. <https://www.openarchives.org/pmh/> 
6. i.e., match the regular expression  
`https?:\\/[\\^\\s/$.??#].[^\\s]*|www\\. [^\\s/$.??#].[^\\s]*.` 
7. i.e., match the regular expression  
`\\b[A-Z][a-z]+(?: et al\\.)? \\(\\d{4}[a-z]?\\)|\\([A-Z][a-z]+(?: et al\\.)?, \\d{4}[a-z]?\\)` 

Supplement: Supplementary file 2 [file EGUSPHERE-2025-5210_S2-analysis.pdf › EGUSPHERE-2025-5210_S2-analysis.pdf]
